# Supplementary material
Source: Springer Nature journal article supplement (https://www.springermedizin.de/resource/supplementary/12958_2014_1257_MOESM2_ESM.pdf/9567168)

**A**

DNA    AA    AA    TA    TA    TT    TT    DNA  
 Marker U   C   U   C   U   C   U   C   U   C

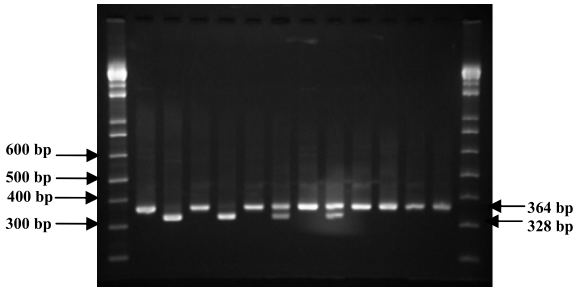**B**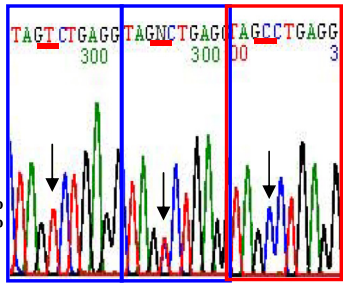

Supplement: MOESM2 [file 9567168]
